# Supplementary material for: APOBEC3-mediated restriction of RNA virus replication
Source: Springer Nature journal article supplement (doi:10.1038/s41598-018-24448-2), 2018-04-11
Supplement: 41598_2018_24448_MOESM1_ESM.pdf [file 41598_2018_24448_MOESM1_ESM.pdf]

# Apobec3-mediated restriction of RNA virus replication

Aleksandra Milewska<sup>a,b,\*</sup>, Eveline Kindler<sup>c,d</sup>, Philip Vkovski<sup>c,d,e</sup>, Slawomir Zeglen<sup>f,g</sup>, Marek Ochman<sup>h</sup>, Volker Thiel<sup>c,d</sup>, Zenon Rajfur<sup>i</sup>, Krzysztof Pyrc<sup>a,b,\*</sup>

<sup>a</sup> Microbiology Department, Faculty of Biochemistry, Biophysics and Biotechnology, Jagiellonian University, Gronostajowa 7, 30-387 Krakow, Poland.

<sup>b</sup> Virogenetics Laboratory of Virology, Malopolska Centre of Biotechnology, Jagiellonian University, Gronostajowa 7a, 30-387 Krakow, Poland.

<sup>c</sup> Institute for Virology and Immunology, Bern and Mittelhäusern, Switzerland.

<sup>d</sup> Department of Infectious Diseases and Pathobiology, Vetsuisse Faculty, University of Bern, Länggassstrasse 122, Bern, Switzerland.

<sup>e</sup> Graduate School for Cellular and Biomedical Sciences, University of Bern, Switzerland.

<sup>f</sup> Department of Cardiac Surgery and Transplantology, Silesian Center for Heart Diseases, Marii Curie-Skłodowskiej 9, 41-800 Zabrze, Poland.

<sup>g</sup> Head of Histology Department, Medical Department, University of Opole

<sup>h</sup> Department of Pharmacology, School of Medicine with the Division of Dentistry in Zabrze, Medical University of Silesia in Katowice

<sup>i</sup> Institute of Physics, Faculty of Physics, Astronomy and Applied Computer Sciences, Jagiellonian University, Lojasiewicza 11, 30-348 Krakow, Poland.

\* **Corresponding authors**

\* Correspondence should be addressed to **Aleksandra Milewska**

([aleksandra.milewska@uj.edu.pl](mailto:aleksandra.milewska@uj.edu.pl)) or **Krzysztof Pyrc** ([k.a.pyrc@uj.edu.pl](mailto:k.a.pyrc@uj.edu.pl)), Microbiology

Department, Faculty of Biochemistry, Biophysics and Biotechnology, Jagiellonian University,

Gronostajowa 7, 30-387 Krakow, Poland; Phone number: +48 12 664 61 21; Fax: +48 12 664

69 02.

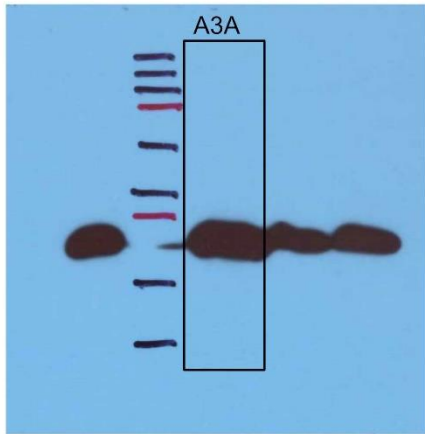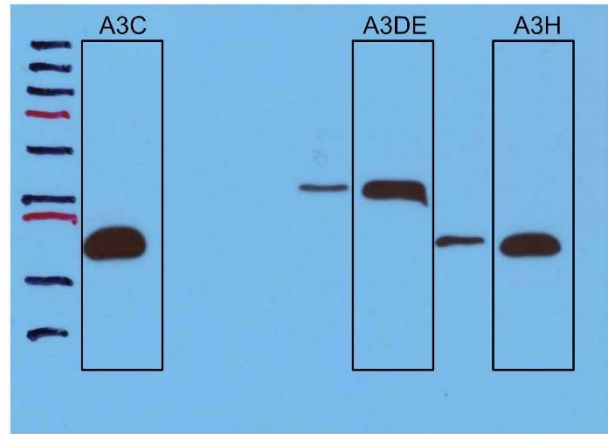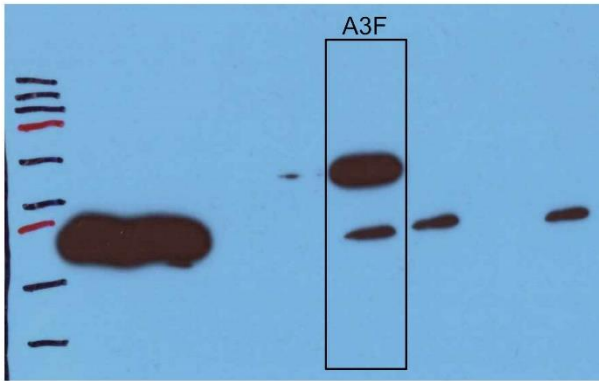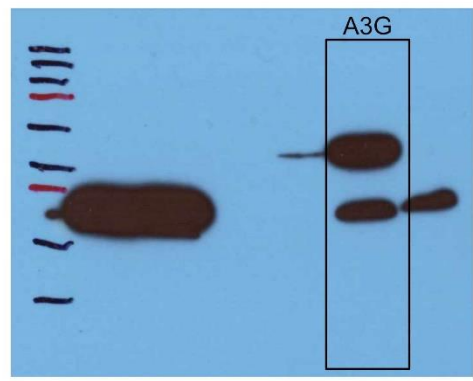

Supplementary Figure 1. Full-size Western blots from Figure 2a.

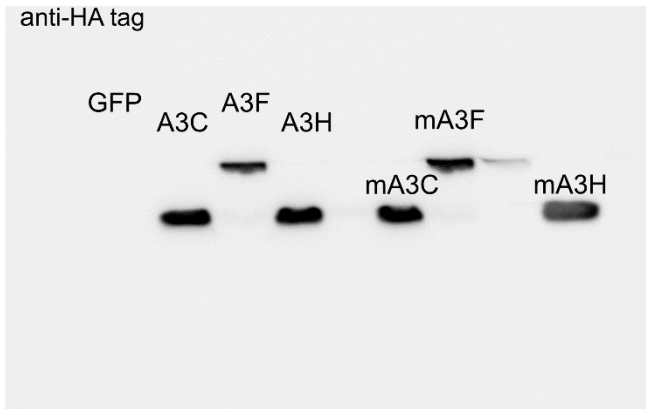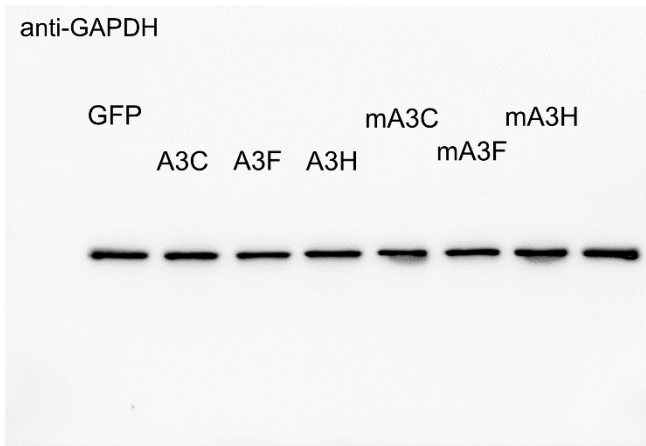

Supplementary Figure 2. Full-size Western blots from Figure 4b.

anti-N NL63

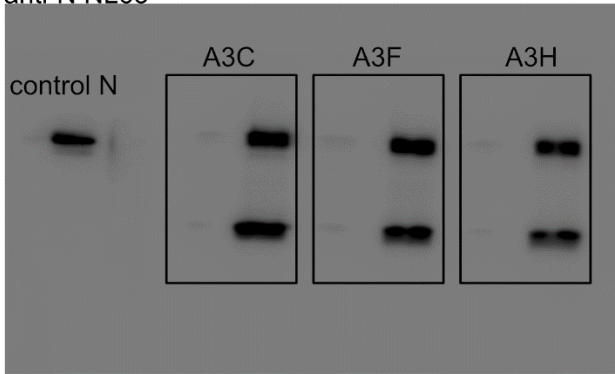

anti-N NL63

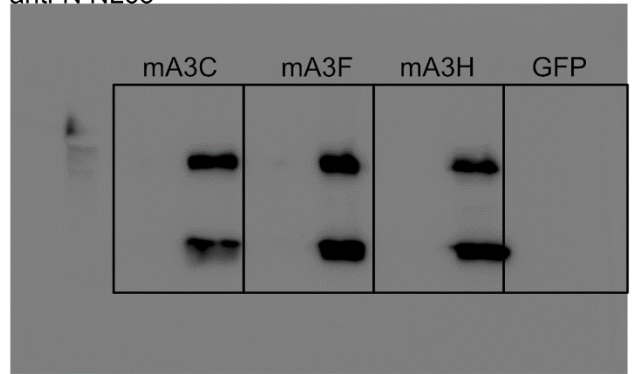

anti-HA tag, co-IP

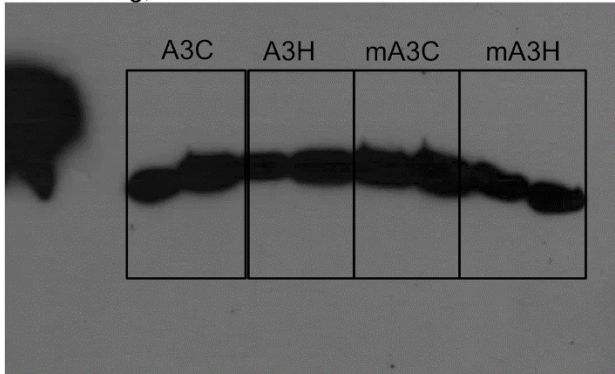

anti-HA tag, co-IP

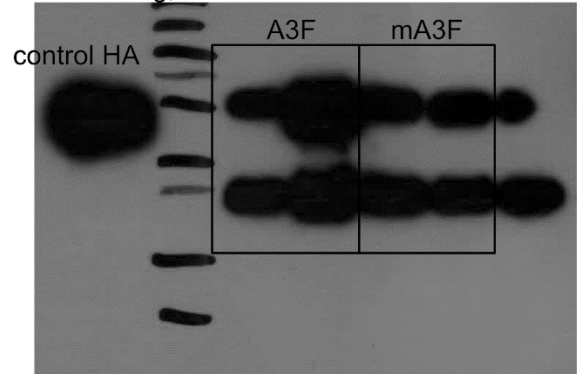

anti-HA tag, input

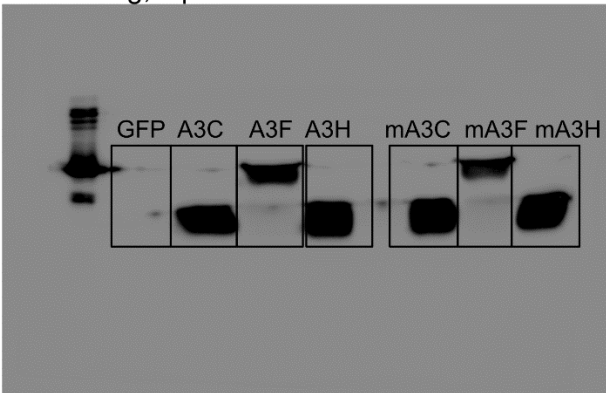

Supplementary Figure 3. Full-size Western blots from Figure 5a.
